# Supplementary material for: Axial Length to Corneal Radius of Curvature Ratio (AL/CR) and Refractive Errors in a Single Center Romanian Population
Source: MDPI journal article supplement (doi:10.3390/biomedicines13112742), 2025-11-10
Supplement: s1 [file biomedicines-3935470-supplementary.pdf › biomedicines-3935470-supplementary.pdf]

## Supplementary materials

**Table S1.** Baseline characteristics table summarizing key demographic and ocular parameters of the study population, primary stratification by refractive error (myopia, emmetropia, hyperopia), secondary by age group and sex.

| Study group | Age     | Gender | N      | Mean    | Std. Deviation | Std. Error Mean |
|-------------|---------|--------|--------|---------|----------------|-----------------|
| Myopia (M)  | 6 - 10  | Male   | 2      | -23.150 | 9.192          | 6.500           |
|             |         | Female | 6      | -42.317 | 278.312        | 113.620         |
|             |         | Male   | 2      | 113.500 | 91.924         | 65.000          |
|             |         | Female | 6      | 124.833 | 212.077        | 86.580          |
|             |         | Male   | 2      | 101.000 | 98.995         | 70.000          |
|             |         | Female | 6      | 123.333 | 223.308        | 91.165          |
|             |         | Male   | 2      | 56.750  | 707.000        | 0.001           |
|             |         | Female | 6      | 0.545   | 0.039          | 0.016           |
|             |         | Male   | 2      | 3.410   | 0.028          | 0.020           |
|             |         | Female | 6      | 3.970   | 0.256          | 0.104           |
|             |         | Male   | 2      | 24.545  | 0.106          | 0.075           |
|             |         | Female | 6      | 24.635  | 1.674          | 0.684           |
|             | Male    | 2      | 7.820  | 0.014   | 0.010          |                 |
|             | Female  | 6      | 7.545  | 0.258   | 0.105          |                 |
|             | Male    | 2      | 3.140  | 0.014   | 0.010          |                 |
|             | Female  | 6      | 32.650 | 16.920  | 6.908          |                 |
|             | 11 - 14 | Male   | 17     | -36.200 | 169.808        | 41.184          |
|             |         | Female | 14     | -28.957 | 115.934        | 30.985          |
|             |         | Male   | 17     | 127.353 | 114.888        | 27.864          |
|             |         | Female | 14     | 122.500 | 190.253        | 50.847          |

|          |         |            |         |        |         |         |        |
|----------|---------|------------|---------|--------|---------|---------|--------|
|          |         | CRF (mmHg) | Male    | 17     | 128.118 | 137.017 | 33.231 |
|          |         |            | Female  | 14     | 126.286 | 122.376 | 32.706 |
|          |         | CCT (mm)   | Male    | 17     | 57.035  | 17.906  | 4.343  |
|          |         |            | Female  | 14     | 55.750  | 30.741  | 8.216  |
|          |         | ACD (mm)   | Male    | 17     | 38.935  | 30.313  | 7.352  |
|          |         |            | Female  | 12     | 39.717  | 8.922   | 2.576  |
|          |         | AL (mm)    | Male    | 17     | 252.694 | 90.064  | 21.844 |
|          |         |            | Female  | 14     | 245.293 | 117.795 | 31.482 |
|          |         | CR (mm)    | Male    | 17     | 77.841  | 26.576  | 6.446  |
|          |         |            | Female  | 14     | 76.964  | 39.361  | 10.520 |
|          | AL/CR   | Male       | 17      | 32.471 | 7.287   | 1.767   |        |
|          |         | Female     | 14      | 31.886 | 6.573   | 1.757   |        |
|          | 15 - 18 | SE (D)     | Male    | 19     | -24.358 | 150.975 | 34.636 |
|          |         |            | Female  | 18     | -33.978 | 204.670 | 48.241 |
|          |         | CH (mmHg)  | Male    | 19     | 117.053 | 157.920 | 36.229 |
|          |         |            | Female  | 18     | 111.389 | 160.115 | 37.740 |
|          |         | CRF (mmHg) | Male    | 19     | 125.737 | 260.146 | 59.682 |
|          |         |            | Female  | 18     | 112.500 | 172.840 | 40.739 |
|          |         | CCT (mm)   | Male    | 19     | 58.068  | 46.878  | 10.755 |
|          |         |            | Female  | 18     | 53.272  | 41.366  | 9.750  |
| ACD (mm) |         | Male       | 18      | 39.650 | 33.806  | 7.968   |        |
|          |         | Female     | 18      | 37.339 | 34.062  | 8.029   |        |
| AL (mm)  | Male    | 19         | 250.721 | 90.827 | 20.837  |         |        |
|          | Female  | 18         | 247.356 | 88.561 | 20.874  |         |        |
| CR (mm)  | Male    | 19         | 78.816  | 21.869 | 5.017   |         |        |

|                |        |            |        |    |         |         |         |
|----------------|--------|------------|--------|----|---------|---------|---------|
|                |        |            | Female | 18 | 76.783  | 25.063  | 5.907   |
|                |        |            | Male   | 19 | 31.816  | 11.182  | 2.565   |
|                |        | AL/CR      | Female | 18 | 32.233  | 9.016   | 2.125   |
|                |        |            | Male   | 21 | -30.800 | 233.023 | 50.850  |
|                |        | SE (D)     | Female | 47 | -28.909 | 218.211 | 31.829  |
|                |        |            | Male   | 21 | 110.429 | 116.601 | 25.444  |
|                |        | CH (mmHg)  | Female | 47 | 110.683 | 150.287 | 21.922  |
|                |        |            | Male   | 21 | 112.571 | 173.625 | 37.888  |
|                |        | CRF (mmHg) | Female | 47 | 108.894 | 139.038 | 20.281  |
|                |        |            | Male   | 21 | 55.805  | 39.301  | 8.576   |
|                |        | CCT (mm)   | Female | 47 | 54.300  | 33.147  | 4.835   |
|                |        |            | Male   | 19 | 37.321  | 27.038  | 6.203   |
|                |        | ACD (mm)   | Female | 43 | 36.677  | 32.067  | 4.890   |
|                |        |            | Male   | 21 | 248.962 | 104.252 | 22.750  |
|                |        | AL (mm)    | Female | 47 | 242.651 | 128.391 | 18.728  |
|                |        |            | Male   | 21 | 77.957  | 24.305  | 5.304   |
|                |        | CR (mm)    | Female | 47 | 76.149  | 21.691  | 3.164   |
|                |        |            | Male   | 21 | 31.967  | 16.042  | 3.501   |
|                | >18    | AL/CR      | Female | 47 | 31.864  | 13.890  | 2.026   |
|                |        |            | Male   | 4  | 2.225   | 18.500  | 9.250   |
|                |        | SE (D)     | Female | 5  | 2.000   | 36.187  | 16.183  |
|                |        |            | Male   | 4  | 135.750 | 47.170  | 23.585  |
|                |        | CH (mmHg)  | Female | 5  | 149.600 | 271.441 | 121.392 |
|                |        |            | Male   | 4  | 123.000 | 50.332  | 25.166  |
|                |        | CRF (mmHg) | Female | 5  | 143.200 | 286.740 | 128.234 |
| Emmetropia (E) | 6 - 10 | CCT (mm)   | Male   | 4  | 57.350  | 3.317   | 1.658   |

|  |         |            |        |    |          |         |         |
|--|---------|------------|--------|----|----------|---------|---------|
|  |         |            | Female | 5  | 57.360   | 42.606  | 19.054  |
|  |         |            | Male   | 4  | 37.050   | 20.469  | 10.235  |
|  |         | ACD (mm)   | Female | 5  | 34.340   | 7.603   | 3.400   |
|  |         |            | Male   | 4  | 231.125  | 37.464  | 18.732  |
|  |         | AL (mm)    | Female | 5  | 229.100  | 24.042  | 10.752  |
|  |         |            | Male   | 4  | 77.275   | 11.500  | 5.750   |
|  |         | CR (mm)    | Female | 5  | 77.740   | 10.807  | 4.833   |
|  |         |            | Male   | 4  | 29.900   | 816.000 | 408.000 |
|  |         | AL/CR      | Female | 5  | 29.460   | 2.510   | 1.122   |
|  |         |            | Male   | 10 | -380.000 | 16.033  | 5.070   |
|  |         | SE (D)     | Female | 10 | 870.000  | 35.979  | 11.377  |
|  |         |            | Male   | 10 | 125.800  | 46.857  | 14.817  |
|  |         | CH (mmHg)  | Female | 10 | 126.900  | 231.490 | 73.204  |
|  |         |            | Male   | 10 | 128.900  | 119.764 | 37.873  |
|  |         | CRF (mmHg) | Female | 10 | 129.000  | 259.315 | 82.003  |
|  |         |            | Male   | 10 | 58.800   | 41.061  | 12.985  |
|  |         | CCT (mm)   | Female | 10 | 55.900   | 46.068  | 14.568  |
|  |         |            | Male   | 10 | 37.670   | 14.384  | 4.549   |
|  |         | ACD (mm)   | Female | 8  | 37.913   | 5.249   | 1.856   |
|  |         |            | Male   | 10 | 247.640  | 89.729  | 28.375  |
|  |         | AL (mm)    | Female | 10 | 233.500  | 76.697  | 24.254  |
|  |         |            | Male   | 10 | 81.360   | 31.595  | 9.991   |
|  |         | CR (mm)    | Female | 10 | 77.400   | 30.478  | 9.638   |
|  |         |            | Male   | 10 | 30.450   | 3.240   | 1.025   |
|  | 11 - 14 | AL/CR      | Female | 10 | 30.180   | 2.936   | 929.000 |

|            |            |        |        |         |         |         |       |
|------------|------------|--------|--------|---------|---------|---------|-------|
| 15 - 18    | SE (D)     | Male   | 5      | -2.760  | 37.159  | 16.618  |       |
|            |            | Female | 12     | -1.658  | 34.888  | 10.071  |       |
|            | CH (mmHg)  | Male   | 5      | 127.200 | 295.753 | 132.265 |       |
|            |            | Female | 12     | 130.167 | 100.800 | 29.098  |       |
|            | CRF (mmHg) | Male   | 5      | 127.600 | 275.372 | 123.150 |       |
|            |            | Female | 12     | 131.500 | 152.762 | 44.099  |       |
|            | CCT (mm)   | Male   | 5      | 58.800  | 51.103  | 22.854  |       |
|            |            | Female | 12     | 57.583  | 26.031  | 7.514   |       |
|            | ACD (mm)   | Male   | 3      | 38.767  | 26.558  | 15.333  |       |
|            |            | Female | 11     | 38.073  | 37.073  | 11.178  |       |
|            | AL (mm)    | Male   | 5      | 239.220 | 78.104  | 34.929  |       |
|            |            | Female | 12     | 231.383 | 103.907 | 29.995  |       |
|            | CR (mm)    | Male   | 5      | 78.080  | 22.005  | 9.841   |       |
|            |            | Female | 12     | 76.283  | 31.634  | 9.132   |       |
|            | AL/CR      | Male   | 5      | 30.640  | 7.092   | 3.172   |       |
|            |            | Female | 12     | 30.333  | 5.245   | 1.514   |       |
|            | >18        | SE (D) | Male   | 18      | 694.000 | 30.532  | 7.196 |
|            |            |        | Female | 28      | 671.000 | 30.941  | 5.847 |
| CH (mmHg)  |            | Male   | 18     | 108.833 | 221.817 | 52.283  |       |
|            |            | Female | 28     | 117.964 | 162.264 | 30.665  |       |
| CRF (mmHg) |            | Male   | 18     | 114.000 | 228.756 | 53.918  |       |
|            |            | Female | 28     | 118.607 | 177.187 | 33.485  |       |
| CCT (mm)   |            | Male   | 18     | 55.772  | 35.516  | 8.371   |       |
|            |            | Female | 28     | 56.043  | 38.153  | 7.210   |       |
| ACD (mm)   | Male       | 18     | 35.917 | 24.457  | 5.765   |         |       |

|         |               |          |            |         |         |         |         |        |
|---------|---------------|----------|------------|---------|---------|---------|---------|--------|
|         |               | AL (mm)  | Female     | 28      | 34.589  | 24.045  | 4.544   |        |
|         |               |          | Male       | 18      | 236.567 | 51.965  | 12.248  |        |
|         |               | CR (mm)  | Female     | 28      | 234.664 | 55.452  | 10.480  |        |
|         |               |          | Male       | 18      | 77.439  | 15.309  | 3.608   |        |
|         |               | AL/CR    | Female     | 28      | 30.264  | 5.201   | 983.000 |        |
|         |               |          | Male       | 18      | 30.550  | 4.162   | 981.000 |        |
|         | Hyperopia (H) | 6 - 10   | SE (D)     | Male    | 6       | 22.317  | 190.964 | 77.961 |
|         |               |          |            | Female  | 11      | 12.982  | 31.597  | 9.527  |
|         |               |          | CH (mmHg)  | Male    | 6       | 129.167 | 211.983 | 86.542 |
|         |               |          |            | Female  | 11      | 129.545 | 180.796 | 54.512 |
|         |               |          | CRF (mmHg) | Male    | 6       | 125.000 | 213.354 | 87.101 |
|         |               |          |            | Female  | 11      | 131.455 | 205.054 | 61.826 |
|         |               | CCT (mm) | Male       | 6       | 56.600  | 21.279  | 8.687   |        |
|         |               |          | Female     | 11      | 56.664  | 35.449  | 10.688  |        |
|         |               | ACD (mm) | Male       | 6       | 36.217  | 37.091  | 15.142  |        |
|         |               |          | Female     | 9       | 35.989  | 23.646  | 7.882   |        |
|         |               | AL (mm)  | Male       | 6       | 228.100 | 112.574 | 45.958  |        |
|         |               |          | Female     | 11      | 227.845 | 53.208  | 16.043  |        |
| CR (mm) | Male          | 6        | 79.000     | 17.297  | 7.062   |         |         |        |
|         | Female        | 11       | 77.409     | 19.154  | 5.775   |         |         |        |
| AL/CR   | Male          | 6        | 28.883     | 10.439  | 4.262   |         |         |        |
|         | Female        | 11       | 29.436     | 4.739   | 1.429   |         |         |        |
| 11 - 14 | SE (D)        | Male     | 5          | 11.780  | 48.792  | 21.821  |         |        |
|         |               | Female   | 5          | 33.780  | 184.467 | 82.496  |         |        |
|         | CH (mmHg)     | Male     | 5          | 121.000 | 327.261 | 146.356 |         |        |

|         |            |        |   |         |         |         |
|---------|------------|--------|---|---------|---------|---------|
|         |            | Female | 5 | 142.200 | 216.032 | 96.613  |
|         | CRF (mmHg) | Male   | 5 | 116.200 | 320.811 | 143.471 |
|         |            | Female | 5 | 134.800 | 192.016 | 85.872  |
|         |            | Male   | 5 | 54.560  | 9.990   | 4.468   |
|         | CCT (mm)   | Female | 5 | 55.600  | 45.951  | 20.550  |
|         |            | Male   | 5 | 37.880  | 12.834  | 5.739   |
|         | ACD (mm)   | Female | 5 | 37.000  | 17.436  | 7.797   |
|         |            | Male   | 5 | 224.700 | 110.917 | 49.603  |
|         | AL (mm)    | Female | 5 | 223.000 | 24.779  | 11.082  |
|         |            | Male   | 5 | 74.760  | 49.303  | 22.049  |
|         | CR (mm)    | Female | 5 | 77.460  | 30.022  | 13.426  |
|         |            | Male   | 5 | 30.060  | 5.683   | 2.542   |
|         | AL/CR      | Female | 5 | 28.800  | 8.916   | 3.987   |
|         |            | Male   | 1 | 7.500   | .       | .       |
|         | SE (D)     | Female | 1 | 6.300   | .       | .       |
|         |            | Male   | 1 | 169.000 | .       | .       |
|         | CH (mmHg)  | Female | 1 | 128.000 | .       | .       |
|         |            | Male   | 1 | 168.000 | .       | .       |
|         | CRF (mmHg) | Female | 1 | 143.000 | .       | .       |
|         |            | Male   | 1 | 63.200  | .       | .       |
|         | CCT (mm)   | Female | 1 | 63.200  | .       | .       |
|         |            | Male   | 1 | 35.700  | .       | .       |
|         | ACD (mm)   | Female | 1 | 34.500  | .       | .       |
|         |            | Male   | 1 | 227.800 | .       | .       |
| 15 - 18 | AL (mm)    | Female | 1 | 232.000 | .       | .       |

|  |            |        |    |         |         |         |
|--|------------|--------|----|---------|---------|---------|
|  |            | Male   | 1  | 77.800  | .       | .       |
|  | CR (mm)    | Female | 1  | 77.400  | .       | .       |
|  |            | Male   | 1  | 29.300  | .       | .       |
|  | AL/CR      | Female | 1  | 30.000  | .       | .       |
|  |            | Male   | 4  | 21.900  | 304.053 | 152.026 |
|  | SE (D)     | Female | 14 | 20.193  | 156.475 | 41.820  |
|  |            | Male   | 4  | 127.000 | 107.393 | 53.697  |
|  | CH (mmHg)  | Female | 14 | 117.857 | 200.724 | 53.646  |
|  |            | Male   | 4  | 118.500 | 221.284 | 110.642 |
|  | CRF (mmHg) | Female | 14 | 119.429 | 229.940 | 61.454  |
|  |            | Male   | 4  | 56.575  | 22.559  | 11.280  |
|  | CCT (mm)   | Female | 14 | 56.779  | 38.375  | 10.256  |
|  |            | Male   | 3  | 36.000  | 42.438  | 24.502  |
|  | ACD (mm)   | Female | 14 | 30.864  | 30.173  | 8.064   |
|  |            | Male   | 4  | 231.250 | 109.537 | 54.768  |
|  | AL (mm)    | Female | 14 | 225.229 | 30.009  | 8.020   |
|  |            | Male   | 4  | 76.875  | 9.359   | 4.679   |
|  | CR (mm)    | Female | 14 | 76.479  | 18.664  | 4.988   |
|  |            | Male   | 4  | 30.075  | 15.218  | 7.609   |
|  | >18        | Female | 14 | 29.464  | 7.581   | 2.026   |
